# Supplementary material
Source: publisher figshare collection journal article supplement (https://sage.figshare.com/ndownloader/files/22285035)

## Supplementary material

Raw data (n=32) is plotted for each of the 93 emotional states within the space employed in experiment 2, i.e., arousal: y-direction and valence: x-direction. The coloured points represent the following image conditions: Female (front view): black, Female (side view): red, Male (front view): green, Male (side view): blue.

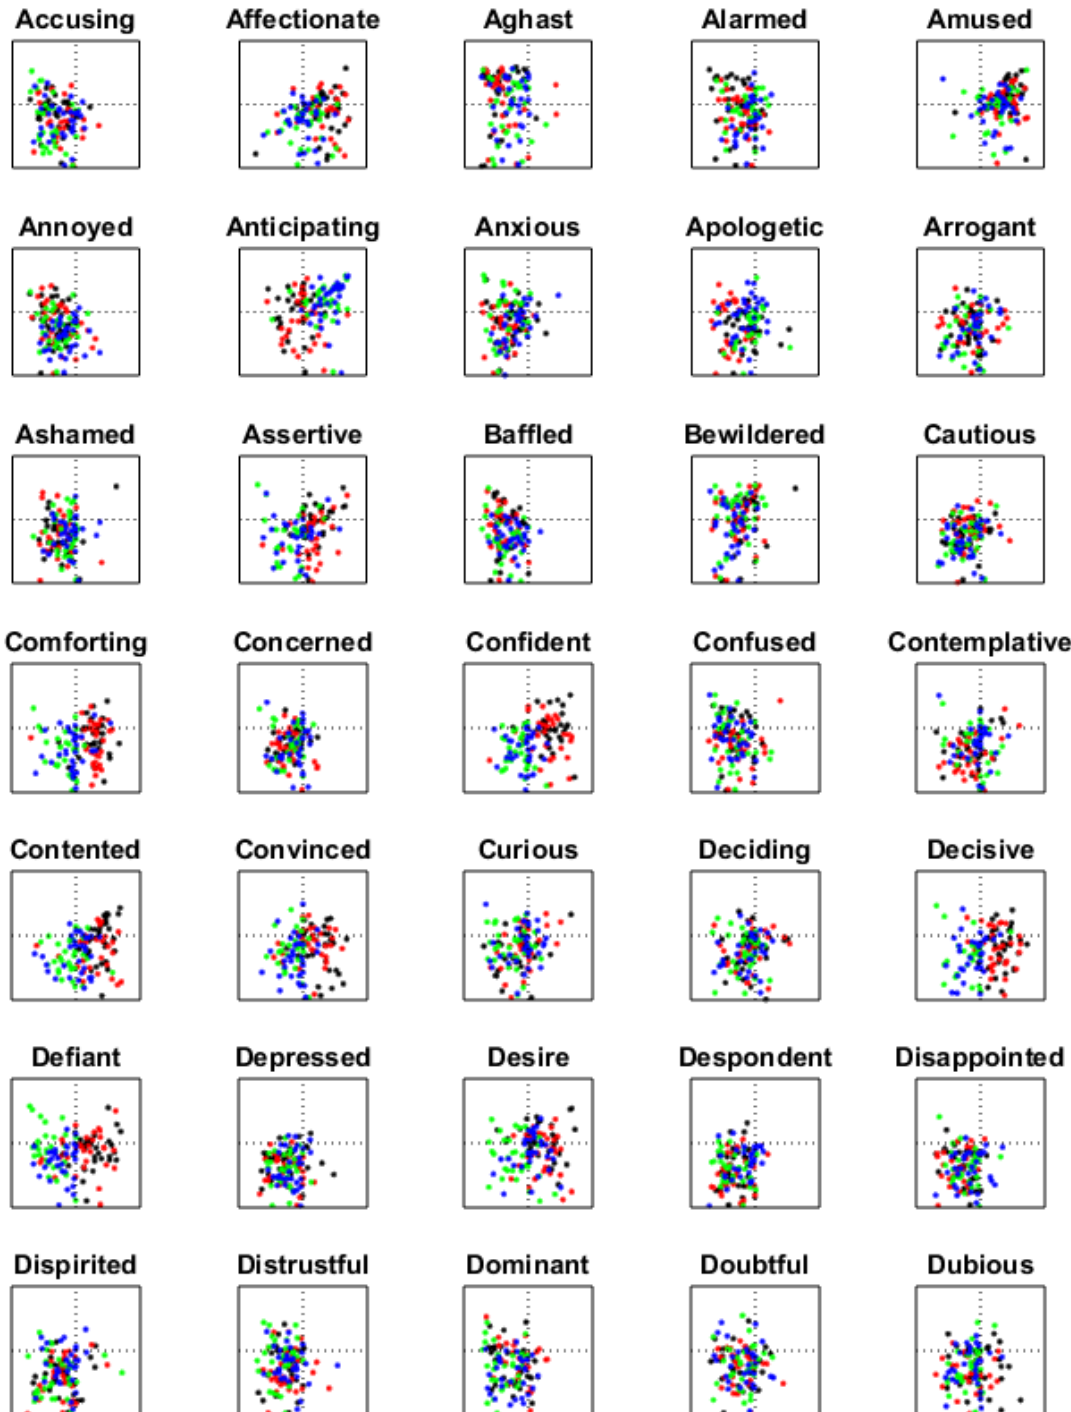

**Eager**

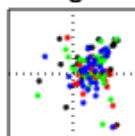

**Earnest**

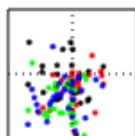

**Embarrassed**

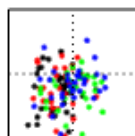

**Encouraging**

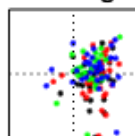

**Entertained**

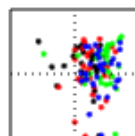

**Enthused**

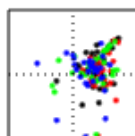

**Fantasizing**

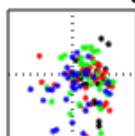

**Fascinated**

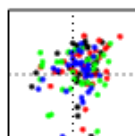

**Fearful**

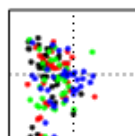

**Flirtatious**

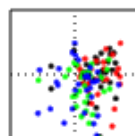

**Flustered**

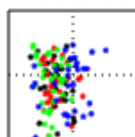

**Friendly**

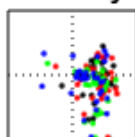

**Grateful**

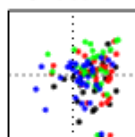

**Guilty**

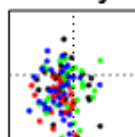

**Hateful**

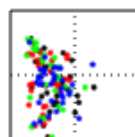

**Hopeful**

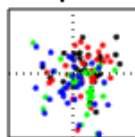

**Horrificed**

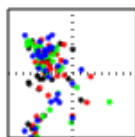

**Hostile**

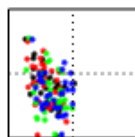

**Impatient**

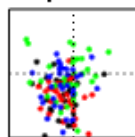

**Imploring**

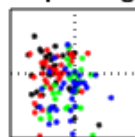

**Incredulous**

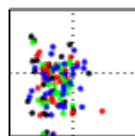

**Indecisive**

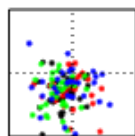

**Indifferent**

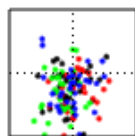

**Insisting**

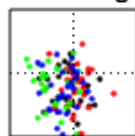

**Insulting**

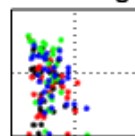

**Interested**

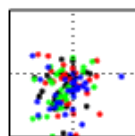

**Intrigued**

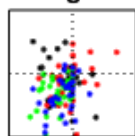

**Irritated**

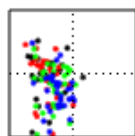

**Jealous**

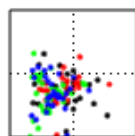

**Joking**

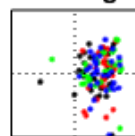

**Nervous**

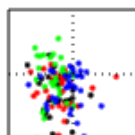

**Offended**

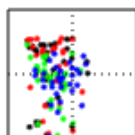

**Panicked**

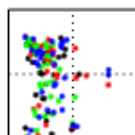

**Pensive**

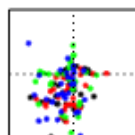

**Perplexed**

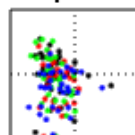

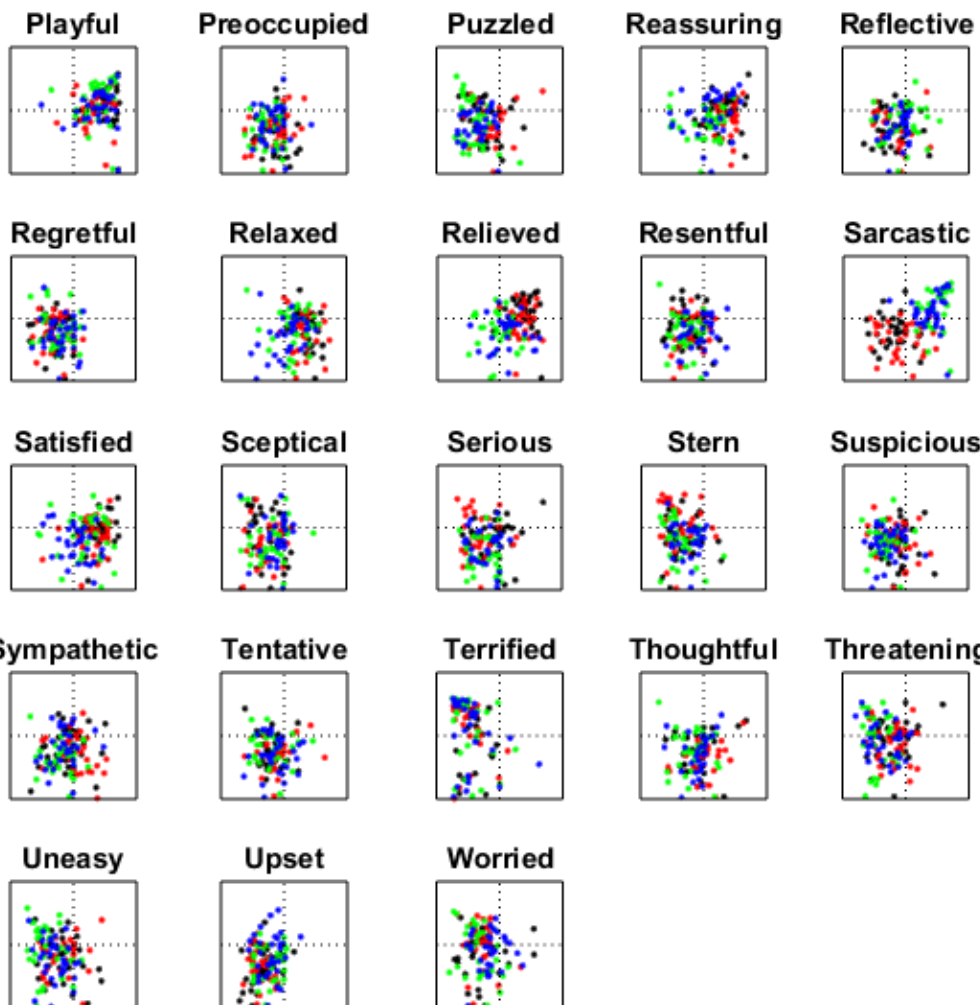

Supplement: Supplementary file [file 22285035]
